# Supplementary material for: Polyphenols Attenuate Highly-Glycosylated Haemoglobin-Induced Damage in Human Peritoneal Mesothelial Cells
Source: MDPI journal article supplement (doi:10.3390/antiox9070572), 2020-07-01
Supplement: s1 [file s1]

**Table S1.** Characteristics of the patients, mean age  $54.66 \pm 5.08$ ; range 23-79 yrs.\*Patients with a diagnosis of cancer were free of metastatic disease and peritoneal involvement.

| Age | Gender | Diagnosis*          | Drugs                            |
|-----|--------|---------------------|----------------------------------|
| 21  | F      | Colonic cancer      | No                               |
| 23  | M      | Hepatic hydatidosis | No                               |
| 27  | M      | Rectal cancer       | No                               |
| 32  | F      | Rectal cancer       | No                               |
| 39  | F      | Cholelithiasis      | Omeprazol Lorazepam<br>Fluoxetin |
| 42  | F      | Rectal cancer       | No                               |
| 44  | F      | Rectal cancer       | No                               |
| 46  | M      | Colonic cancer      | No                               |
| 51  | M      | Colonic cancer      | No                               |
| 55  | M      | Colonic cancer      | No                               |
|     |        |                     |                                  |

### Cell culture

HPMCs were isolated from omental tissue from 10 different donors (free of any cardiovascular or peritoneal disease and non-taking anti-inflammatory drugs or antioxidants) undergoing nonurgent, non-septic abdominal surgery, using previously described methods (Chung-Welch et al., 1997). HPMC were routinely cultured in M199 containing 1 g l<sup>-1</sup> of D-glucose and supplemented with 10% FCS, 100 mgml<sup>-1</sup> streptomycin, 100Uml<sup>-1</sup> penicillin, and 2.5 mgml<sup>-1</sup> amphotericin. At confluence, HPMC were passaged using a 0.02% EDTA–0.05% trypsin solution and split in a 1:2 ratio.

HPMCs characterization was based on both cell morphology (immediately prior to and at confluence, cells adopted the polygonal cobblestone-like appearance characteristic of epithelial cells and formed a monolayer) and indirect immunofluorescence staining of several human mesothelial markers (Chung-Welch et al., 1997). In brief, HPMC showed a diffuse positive staining with an anti-von Willebrand factor antibody (Dakopatts, Glostrup, Denmark) and a marked staining with anti-cyokeratins 8 and 18, anti-E-cadherin, and anti-vimentin antibodies (all of them from Sigma Chemical Co.). HPMC failed to express the endothelial marker PECAM-1 (CD31) (see Supplemental data, Table 2).

**Table S2. HPMC characterization.**

| <i>Markers</i>                  | <i>HPMC</i>      | <i>HAEC</i>       | <i>HUVEC</i>      | <i>HASMC</i> |
|---------------------------------|------------------|-------------------|-------------------|--------------|
| <b><i>Factor VIII (vWF)</i></b> | +/-<br>(diffuse) | +++<br>(granular) | +++<br>(granular) | negative     |
| <b><i>α-actin</i></b>           | negative         | negative          | negative          | +++          |
| <b><i>E-Cadherin</i></b>        | ++               | negative          | negative          |              |
| <b><i>VE-Cadherin</i></b>       | +++              | ++                | ++                |              |
| <b><i>Vimentin</i></b>          | +++              | ++                | ++                |              |
| <b><i>Cytokeratin 8</i></b>     | ++               | ++                | ++                |              |
| <b><i>Cytokeratin 18</i></b>    | ++               | ++                | ++                |              |
| <b><i>PECAM-1(CD31)</i></b>     | negative         | ++                |                   |              |

**HPMC**, Human Peritoneal Mesothelial Cells; **HAEC**, Human Aortic Endothelial Cells; **HUVEC**, Human Umbilical Vascular Endothelial Cells; **HASMC**, Human Aortic Smooth Muscle Cells. The morphologic and immunofluorescence-staining features of the

cells remained stable throughout the passages used.

### ***Preparation of Amadori adducts***

Lyophilised human haemoglobins, nonenzymatically glycosylated at either elevated or normal levels, containing 11.1% and 5.4% HbA1, respectively, were purchased from Sigma. Briefly, haemoglobins were dissolved in deionised water and subsequently reduced by incubation with an excess of sodium dithionite. The haemoglobin solutions were then extensively dialysed using a 0.25A° pore diameter (approximately 12 kDa mol wt) dialysis membrane (Viskings, Serva, Heidelberg, Germany) against deionised water containing 10mg<sup>l</sup><sup>-1</sup> EDTA and continuously bubbled with N<sub>2</sub>. Oxyhaemoglobins were then aliquoted and stored at -70 °C until used.

The absence of AGEs in the glycated oxyhaemoglobin solutions was assessed by measuring fluorescence in a Fluostar fluorometer (BMG Labtechnologies, Offenburg, Germany) at excitation maximum of 370 nm and emission maximum of 440 nm, which allows quantifying total AGEs (Sell & Monnier, 1989). A standard curve ( $r^2=0.99$ ) was carried out using AGE-modified BSA (0.5–5 mgml<sup>-1</sup>), prepared following a previously described method (Bucala et al., 1991). Glycated preparations did not contain significant bacterial endotoxin contamination (<0.5U endotoxin ml<sup>-1</sup>), as measured with Pyrogens plus kit (Biowhittaker Europe SPRL, Verviers, Belgium).
